# Supplementary material
Source: Springer Nature journal article supplement (https://www.springermedizin.de/resource/supplementary/12885_2014_4670_MOESM4_ESM.pdf/9467018)

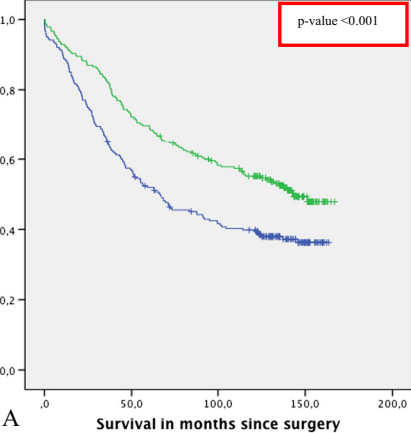

Foxp3+ above median

Foxp3+ below median

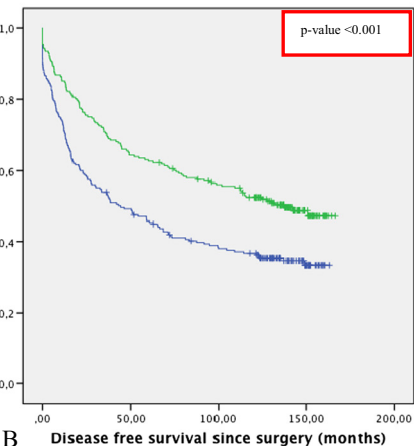

Foxp3+ above median

Foxp3+ below median

Supplement: MOESM4 [file 9467018]
